# Supplementary material for: Cross-species alcohol dependence-associated gene networks: Co-analysis of mouse brain gene expression and human genome-wide association data
Source: PubMed Central journal article supplement (PMC6481773; doi:10.1371/journal.pone.0202063), 2019-04-24

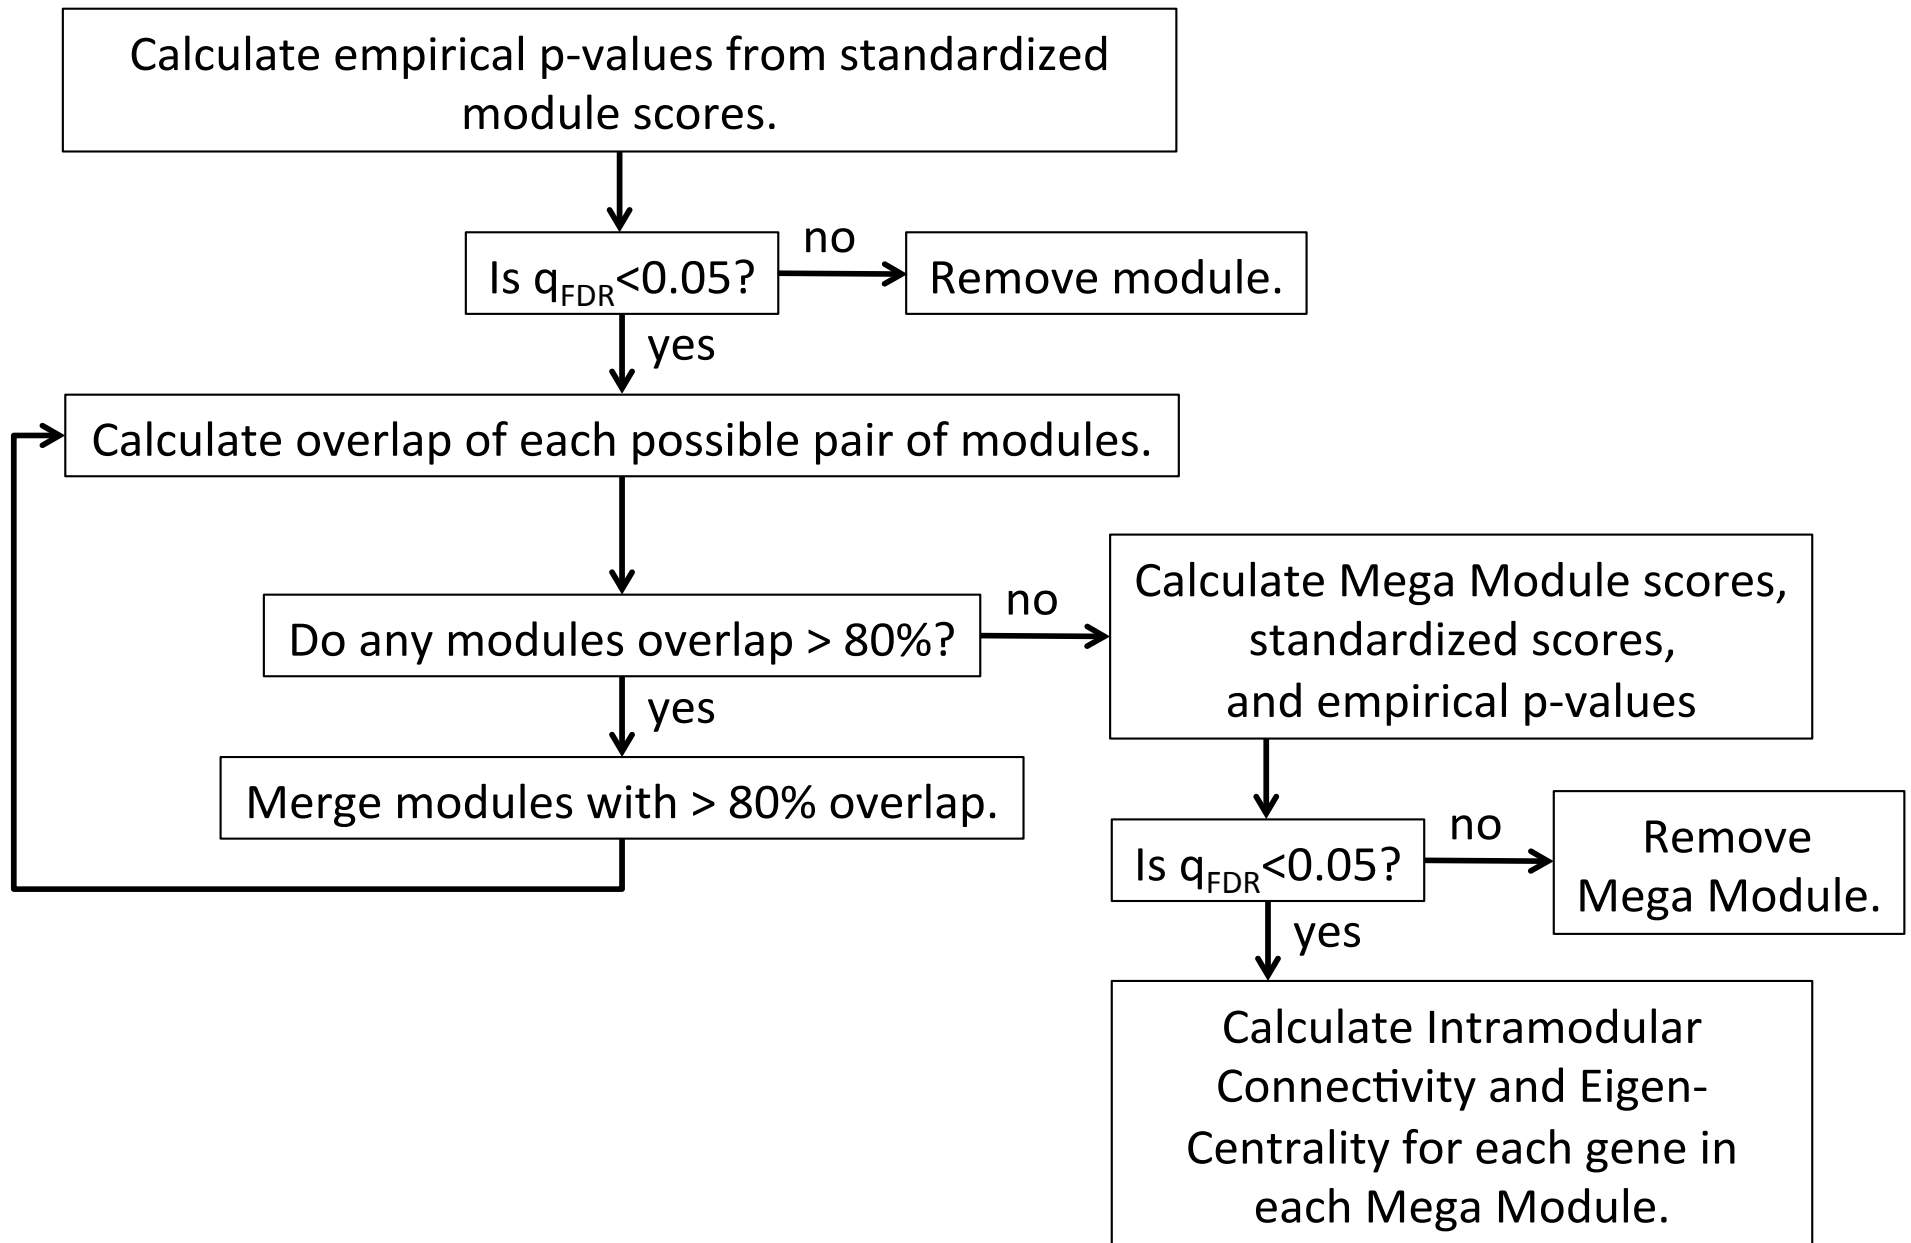

Supplement: pone.0202063.s001.pdf [file pone.0202063.s001.pdf]
